# Supplementary material for: The mechanism of a high-affinity allosteric inhibitor of the serotonin transporter
Source: PubMed Central journal article supplement (PMC7083837; doi:10.1038/s41467-020-15292-y), 2020-03-20
Supplement: 41467_2020_15292_MOESM6_ESM.pdf [file 41467_2020_15292_MOESM6_ESM.pdf]

**Title: Supplementary Movie 1. The quinolinone moiety of S2:Lu AF60097 can protrude into a sub-pocket near the tip of the EL4b in the presence of S1:IMI.**

**Description:** Representative trajectory of “S1:IMI/S2:Lu AF60097” (3.6  $\mu$ s) simulation show varied dynamics of the quinolinone moiety of S2:Lu AF60097. In the presence of S1:IMI, this moiety protrudes into a sub-pocket near the tip of the EL4b. This is not possible in the presence of S1:S-CIT (Supplementary Movie 2). The S1 and S2 ligands are in sphere representations and in the same color scheme as in Fig. 3c,d.

**Title: Supplementary Movie 2. The quinolinone moiety of S2:Lu AF60097 can not protrude into a sub-pocket near the tip of the EL4b in the presence of S1:S-CIT.**

**Description:** Representative trajectories of “S1:S-CIT/S2:Lu AF60097” (3.0  $\mu$ s) simulation show varied dynamics of the quinolinone moiety of S2:Lu AF60097. In the presence of S1:S-CIT, this moiety cannot protrude into a sub-pocket near the tip of the EL4b as is allowed in the S1-IMI condition (Supplementary Movie 1). The S1 and S2 ligands are in sphere representations and in the same color scheme as Fig. 3c,d.
